# Supplementary material
Source: PubMed Central journal article supplement (PMC3114246)
Supplement: neo1306_0526SD1.pdf [file neo1306_0526SD1.pdf]

**Table W1.** Characteristics of Human Prostate Tumor Samples.

| Patient No. | Age at dg (yr) | PSA at dg | Neoadjuvant Therapy | Tissue | pT   | pN  | GS    |
|-------------|----------------|-----------|---------------------|--------|------|-----|-------|
| 1           | 55             | 83.5      | HFM                 | Both   | pT3b | pN0 | 5 + 3 |
| 2           | 68             | 108.4     | BIC                 | Both   | pT3b | pN1 | 3 + 4 |
| 3           | 54             | 60        | HFM, LHRH           | Both   | pT4  | pN0 | 3 + 3 |
| 4           | 60             | 9.7       | BIC, HFM, LHRH      | Both   | pT2b | pN0 | 3 + 4 |
| 5           | 64             | 52        | HFM                 | After  | pT3a | pN1 | 4 + 5 |
| 6           | 58             | 29.1      | HFM                 | After  | pT2b | pN0 | 3 + 4 |
| 7           | 50             | 47.2      | HFM                 | After  | pT3b | pN1 | 4 + 5 |
| 8           | 54             | 24.39     | HFM, CPA            | After  | pT3b | pN0 | 4 + 5 |
| 9           | 66             | 8.2       | HFM                 | After  | pT2b | pN0 | 3 + 5 |
| 10          | 63             | 5.7       | BIC, HFM            | After  | pT2b | pN0 | 3 + 4 |
| 11          | 59             | 8.5       | None                | Before | pT2b | pNx | 3 + 4 |
| 12          | 66             | 7.07      | None                | Before | pT2b | pN0 | 4 + 4 |
| 13          | 69             | 8.22      | None                | Before | pT3a | pN0 | 2 + 2 |
| 14          | 63             | 9.8       | None                | Before | pT2c | pNx | 3 + 4 |
| 15          | 66             | 32        | None                | Before | pT2b | pN0 | 3 + 2 |
| 16          | 66             | 8.29      | None                | Before | pT2b | pN0 | 4 + 5 |

BIC indicates bicalutamide; CPA, cyproterone acetate; dg, diagnosis; GS, Gleason score; HFM, hydroxyflutamide; LHRH, luteinizing hormone-releasing hormone analog; pNx, no lymphadenectomy; pT, pathologic T stage; Tissue, type of tissue available with respect to the neoadjuvant therapy (before, after, both).

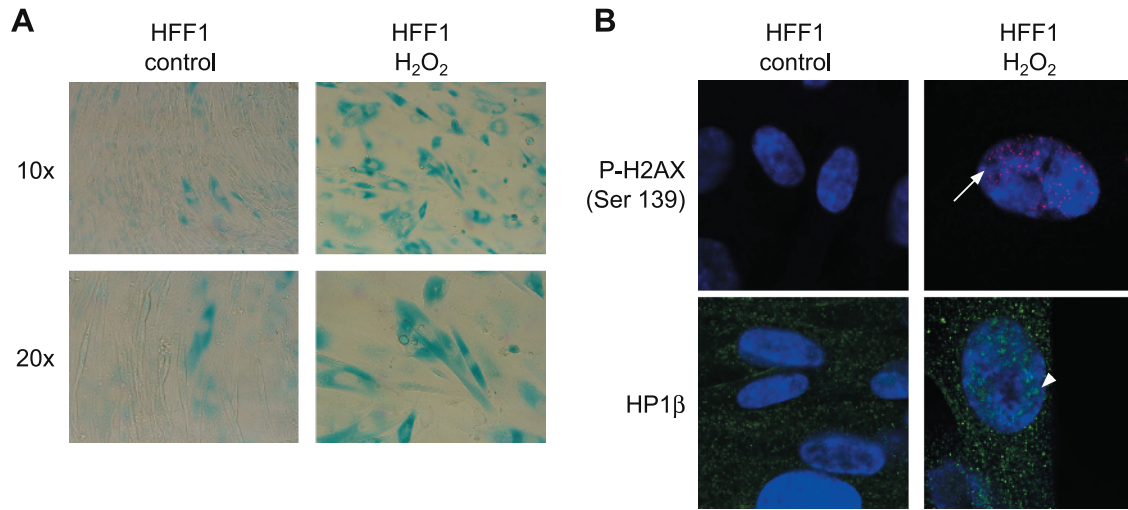

**Figure W1.** Expression of markers of senescence in human foreskin fibroblasts (HFF-1) cells after exposure to 200  $\mu$ M hydrogen peroxide (H<sub>2</sub>O<sub>2</sub>). (A) SA- $\beta$ -gal staining of control and H<sub>2</sub>O<sub>2</sub>-treated HFF-1 cells. (B) Confocal images of P-H2AX (S139) and HP1 $\beta$  immunofluorescence in control and H<sub>2</sub>O<sub>2</sub>-treated HFF-1 cells. White arrow and arrowhead, positive signal for P-H2AX (S139) staining and formation of HP1 $\beta$  foci, respectively.

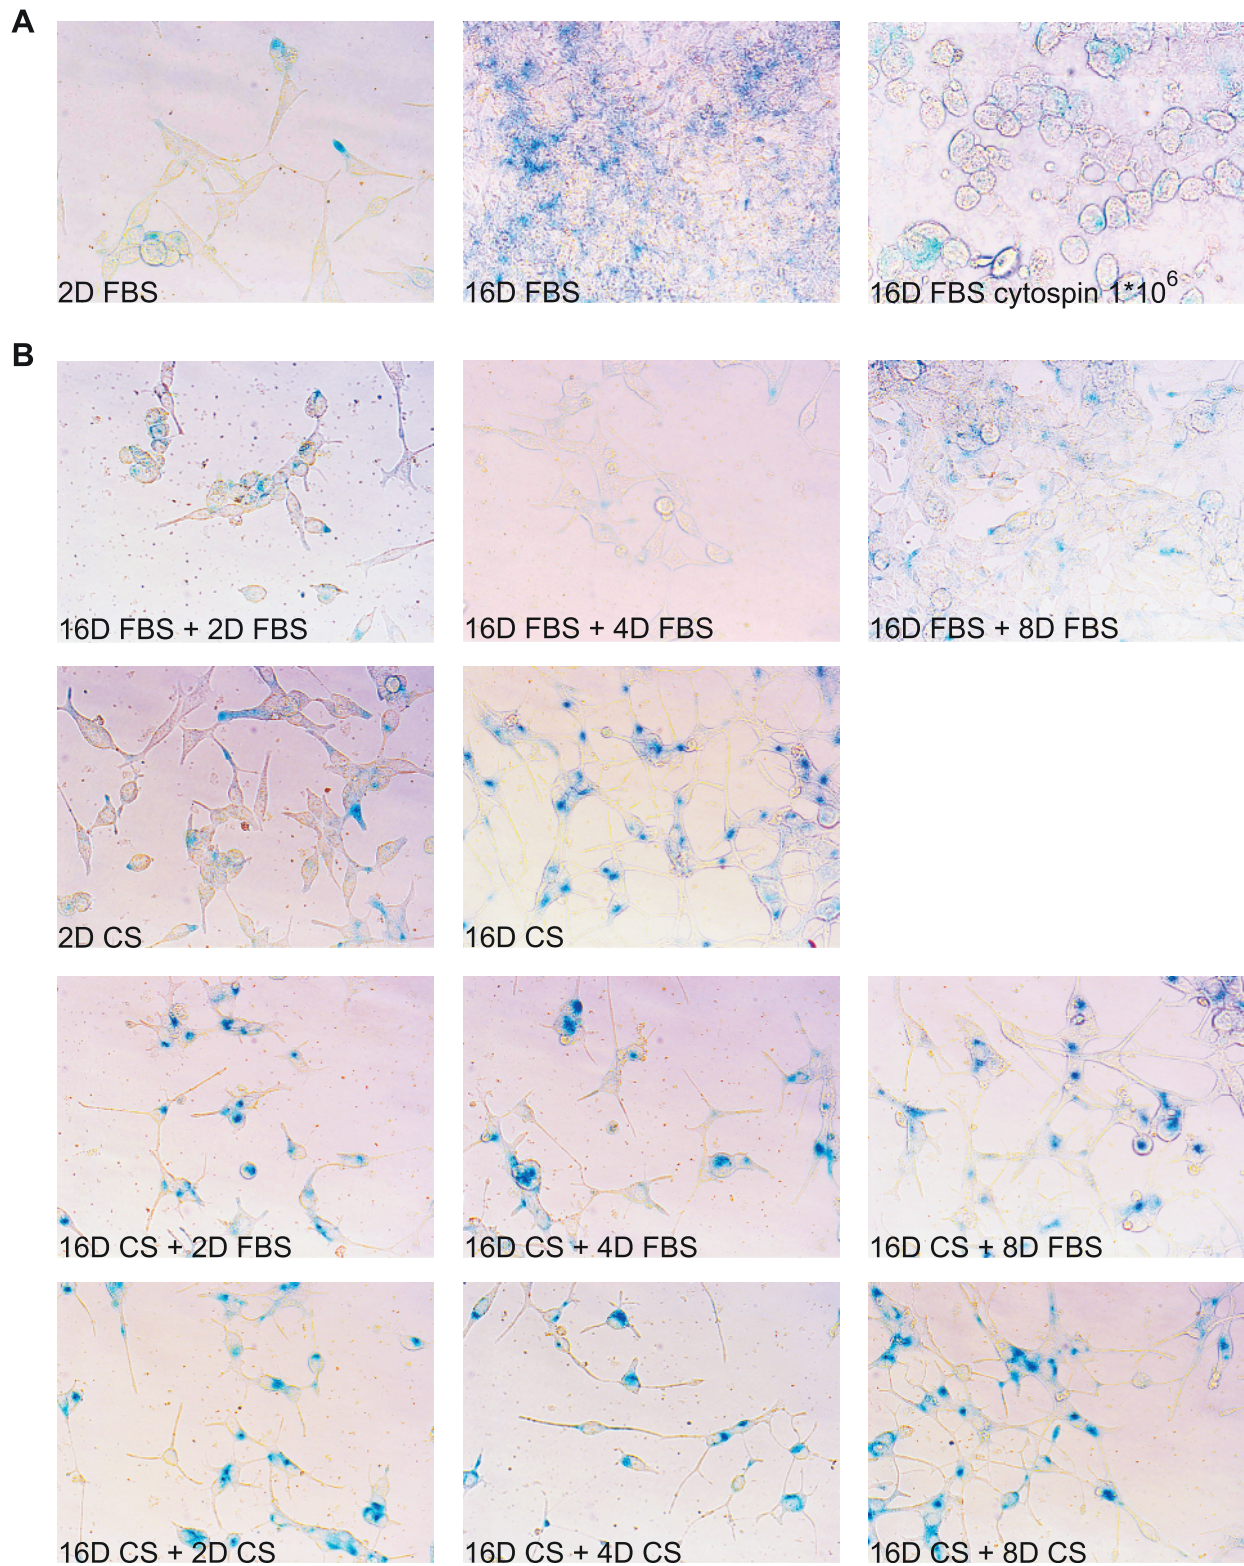

**Figure W2.** Senescence induced by androgen depletion is irreversible. (A) Cytochemical detection of SA- $\beta$ -gal activity in long-term cultivated LNCaP cells after reseedling. Cytochemical analysis of SA- $\beta$ -gal activity showed false positivity in the case of highly confluent cells, when such cells were negative after their dissociation followed by cytopsin. (B) The cells were cultivated for 16 days and then reseeded at a low density (10,000 cells/cm<sup>2</sup>) in appropriate media. The cells grown in FBS were reseeded in medium with FBS; cells grown in CS were reseeded in medium containing either CS or FBS. Reseeded cells were grown for an additional 2, 4, and 8 days (16 + 2, 16 + 4, and 16 + 8, respectively) without reseedling. (C) Analysis of cell numbers in response to reseedling. Data represent mean  $\pm$  SD of two independent experiments.

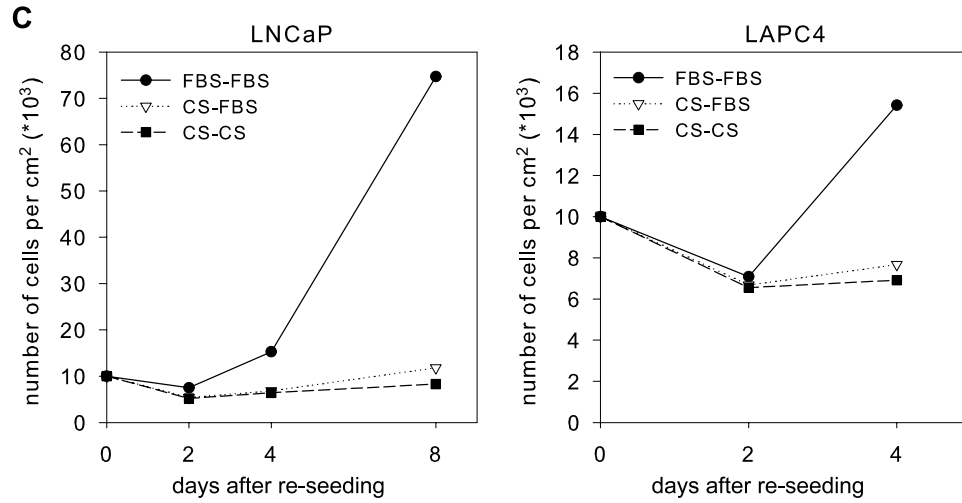

**Figure W2.** (continued).

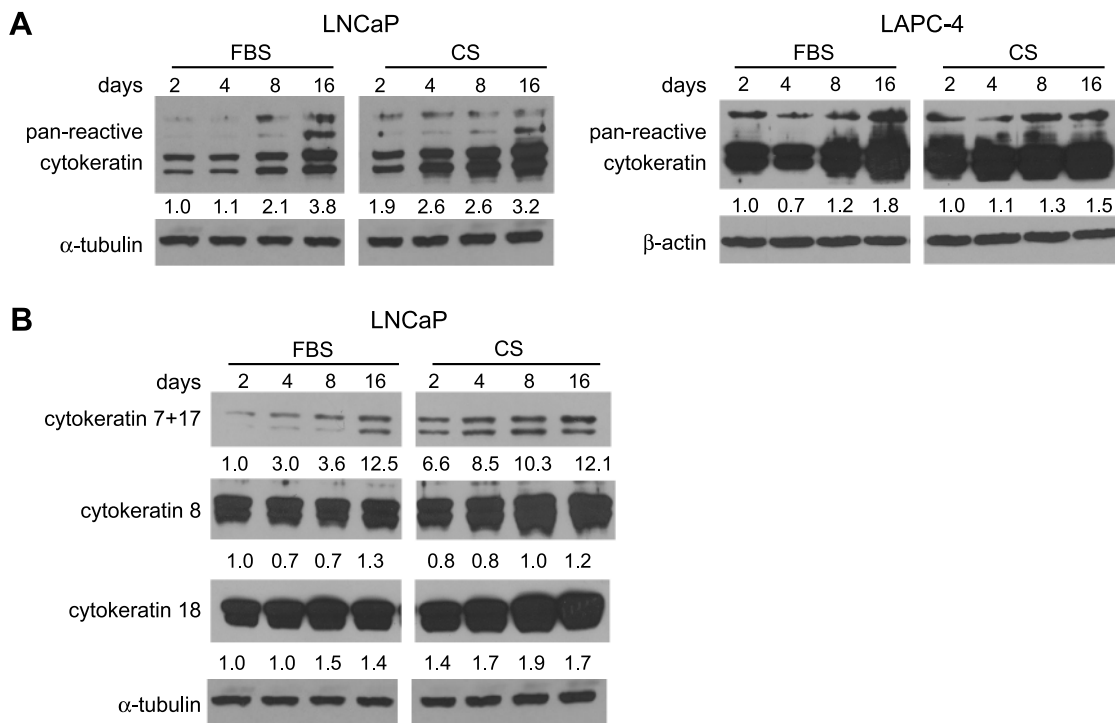

**Figure W3.** Western blot analysis of expression of cytokeratins in LNCaP and LAPC-4 cells cultivated in the presence (FBS) or absence (CS) of androgens. (A) Expression of cytokeratins detected by a pan-reactive cytokeratin antibody. (B) Cytokeratin 7 + 17, cytokeratin 8, and cytokeratin 18 expression in LNCaP cells. α-Tubulin was used as a loading control.
